# Supplementary material for: Comprehensive database enables the UHPLC-Q-orbitrap-MS/MS method to discover 16 “overlooked” compounds and supply three new pharmacopoeia quality-markers for charred Semen Arecae ( Jiaobinglang )
Source: Royal Society of Chemistry journal article supplement (doi:10.1039/d5ay01507c), 2026-01-01
Supplement: d5ay01507c2.xlsx [file d5ay01507c2.xlsx]

## Sheet: Sheet1
Name	Regression equation	Linear range（μg/mL）	R	Area Mean±SD (n=3)	quantification（μg/g, mean±SD, n=3)	RSD %	LLOD μg	Accuracy %
								Intraday	Inter-day
Trigonelline (1)	y=99685337761.43x	0.0 ~ 30.0	0.9949	858059825.31±101882986.75	4.00±0.04	1	0.0051	96.31	96.3
Betaine (2)	y=31405281691.49x+405565766.09	1.0 ~ 30.0	0.996	428242049.65±21955696.65	4.03±0.19	4.71	0.0035	105.07	94.89
D-gluconic acid (3)	y=18648843467.55x-72370946.33	1.0 ~ 30.0	0.9993	342572471.07±16917786.79	10.34±0.42	4.06	0.0045	95.31	95.285
Arecoline (4)	y=45490057228.38x+137473471.41	1.0 ~ 30.0	0.9947	50578546048.10±2114159955.15	515.52±21.61	4.19	0.2324	102.28	98.255
Sucrose (5)	y=710628732.9808x+29840349.57	1.0 ~ 30.0	0.9967	1146381989.82±16973418.12	730.49±11.10	1.52	0.1194	95.32	95.99
Guvacoline (6)	y=34382463215.84x+566327324.75	1.0 ~ 30.0	0.9905	10295654119.14±924401886.13	131.56±2.50	1.9	0.1344	97.98	97.98
L-Phenylalanine (7)	y=4976719040.50x+115768785.80	1.0 ~ 30.0	0.9908	606684394.47±57770813.80	45.86±1.40	3.05	0.058	96.33	99.33
5-Hydroxymethylfurfural (8)	y=20026297837.41x-133449798.48	1.0 ~ 30.0	0.9901	1017358307.32±245401182.71	26.72±0.36	1.35	0.0613	95.37	95.34
Protocatechuic acid (9)	y=16260066495.49x-36044527.03	1.0 ~ 30.0	0.9977	2402394564.71±53666832.50	69.72±1.53	2.19	0.0165	95.24	99.18
Procyanidin B3 (10)	y=14130626134.80x-28294064.97	1.0 ~ 30.0	0.9987	1314075296.50±23040369.48	44.17±0.76	1.72	0.0082	95.97	102.79
Procyanidin B1 (11)	y=7577873402.45x-20596474.4602	1.0 ~ 30.0	0.9977	37458889.00±3931196.92	3.56±0.15	4.21	0.0026	94.17	93.855
Epigallocatechin (12)	y=39461193350.51x-104851991.06	1.0 ~ 30.0	0.9977	192752994.51±93118644.68	3.51±0.10	2.85	0.0118	97.53	97.19
(+)-Catechin (13)	y=13454536133.02x+132309764.70	1.0 ~ 30.0	0.9922	36888371867.08±1433600640.51	1270.11±49.54	3.9	0.0165	96.12	96.015
Procyanidin B2 (14)	y=18292848749.97x-45478240.73	1.0 ~ 30.0	0.9995	179417005.50±145226.30	5.72±0.004	0.07	0.0817	94.79	94.47
Cis-4-Hydroxycinnamic Acid (15)	y=19876570202.65x-15150119.54	1.0 ~ 30.0	0.9971	100077017.18±4309383.52	2.70±0.10	3.7	0.0011	95.36	99.36
epicatechin (16)	y=13929819739.01x+79946321.99	1.0 ~ 30.0	0.9976	12934544239.37±7479548.12	429.04±0.25	0.06	0.0027	96.31	96.3
(+) Taxifolin (17)	y=49709262173.44x-8524964.11	1.0 ~ 30.0	0.9932	49961534.52±1191952.87	0.55±0.01	1.82	0.0001	95.12	95.015
Indole-3-acetic acid (18)	y=14436559070.27x-117030015.15	1.0 ~ 30.0	0.996	23065377.26±1865981.15	4.51±0.06	1.33	0.0006	97.33	97.005
Typhaneoside (19)	y=22077604121.81x+5919219.54	1.0 ~ 30.0	0.9901	31319200.33±4691782.14	0.53±0.01	1.89	0.0011	95.69	95.37
Rutin (20)	y=41144818522.27x-54534776.95	1.0 ~ 30.0	0.9977	73460763.64±2090263.82	1.45±0.02	1.38	0.0003	95.37	95.34
Kaempferol-3-O-glucorhamnoside (21)	y=19947477077.13x-24418152.38	1.0 ~ 30.0	0.9964	58987769.91±2481093.16	1.94±0.06	3.09	0.0006	95.31	95.285
Isorhamnetin 3-O-neohesperoside (22)	y=43342762164.87x-18713155.76	1.0 ~ 30.0	0.9941	1410121782.80±13607361.36	15.33±0.15	0.98	0.0016	96.28	96.255
1,3,5,6,-Tetrahydroxyxanthone (23)	y=41926345521.96x-118535282.51	1.0 ~ 30.0	0.9977	34983759.69±418260.26	1.70±0.005	0.29	0.0017	95.25	95.21
Perilladehyde (24)	y=975995688.02x+5563369.72	1.0 ~ 30.0	0.99	24263561.43±4080619.01	8.91±0.23	2.58	0.0209	97.96	97.95
Viscidulin I (25)	y=918308554.60x-1649059.68	1.0 ~ 30.0	0.9989	161923557.50±2807850.03	82.81±1.42	1.71	0.0153	99.65	100.27
S-naringenin (26)	y=50439054315.23x	0.0 ~ 30.0	0.9972	32503431.08±2667944.49	0.30±0.01	3.33	0.0003	96.32	96.315
Kaempferol (27)	y=170525008582.77x	0.0 ~ 30.0	0.9961	13314605.65±2321926.98	0.06±0.002	3.33	0.0017	95.01	94.845
Isorhamnetin (28)	y=26818364703.14x-15329739.81	1.0 ~ 30.0	0.9948	41300622.87±10784.87	0.98±0.0002	0.02	0.002	100.67	102.34
Senkyunolide A (29)	y=14937256977.25x+50855292.91	1.0 ~ 30.0	0.9969	156699766.94±19095284.61	3.29±0.05	1.52	0.0064	94.34	98.33
Methyl benzoate (30)	y=907897191.26x	0.0 ~ 30.0	0.9975	15344508.29±2168128.85	7.86±0.11	1.4	0.0119	97.03	96.555
6-Gingerol (31)	y=4823735967.67x	0.0 ~ 30.0	0.9948	23979504.78±4475.44	2.31±0.02	0.08	0.0012	94.71	99.89
4-Isopropyltoluene (32)	y=2121853186.36x+3409314.53	1.0 ~ 30.0	0.9987	121583257.20±549894.10	25.89±0.12	0.46	0.0013	95.70	95.385
4-Allylphenol (33)	y=667489536.32x+2667374.95	1.0 ~ 30.0	0.9956	22484843.16±293649.47	13.80±0.20	1.45	0.0022	94.89	94.62
Costunolide (34)	y=139303988877.53x-402080589.63	1.0 ~ 30.0	0.9991	12361690.48±617500.44	1.38±0.002	0.14	0.0012	95.81	99.65
Chloesteryl acetate (35)	y=60006029.95x+9582634.37	1.0 ~ 30.0	0.9901	71807814.06±1234403.24	482.12±9.56	1.98	0.1029	94.88	103.69
