# Supplementary material for: Comprehensive database enables the UHPLC-Q-orbitrap-MS/MS method to discover 16 “overlooked” compounds and supply three new pharmacopoeia quality-markers for charred Semen Arecae ( Jiaobinglang )
Source: Royal Society of Chemistry journal article supplement (doi:10.1039/d5ay01507c), 2026-01-01
Supplement: d5ay01507c3.zip [file Suppl._2.13_Iden_(+)-Catechin_CAS_154-23-4.1.docx]

*Suppl. 2.13* Identification of (+)-catechin (CAS 154-23-4, C15H14O6, M.W. 290.3).


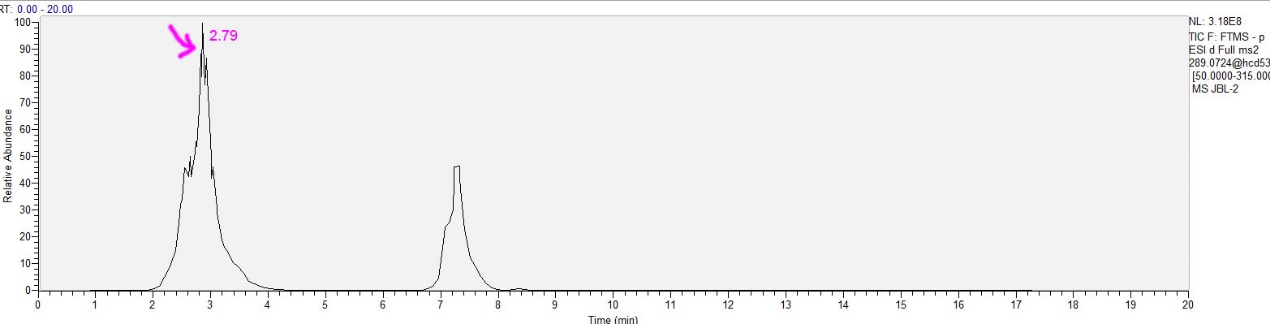


**A**


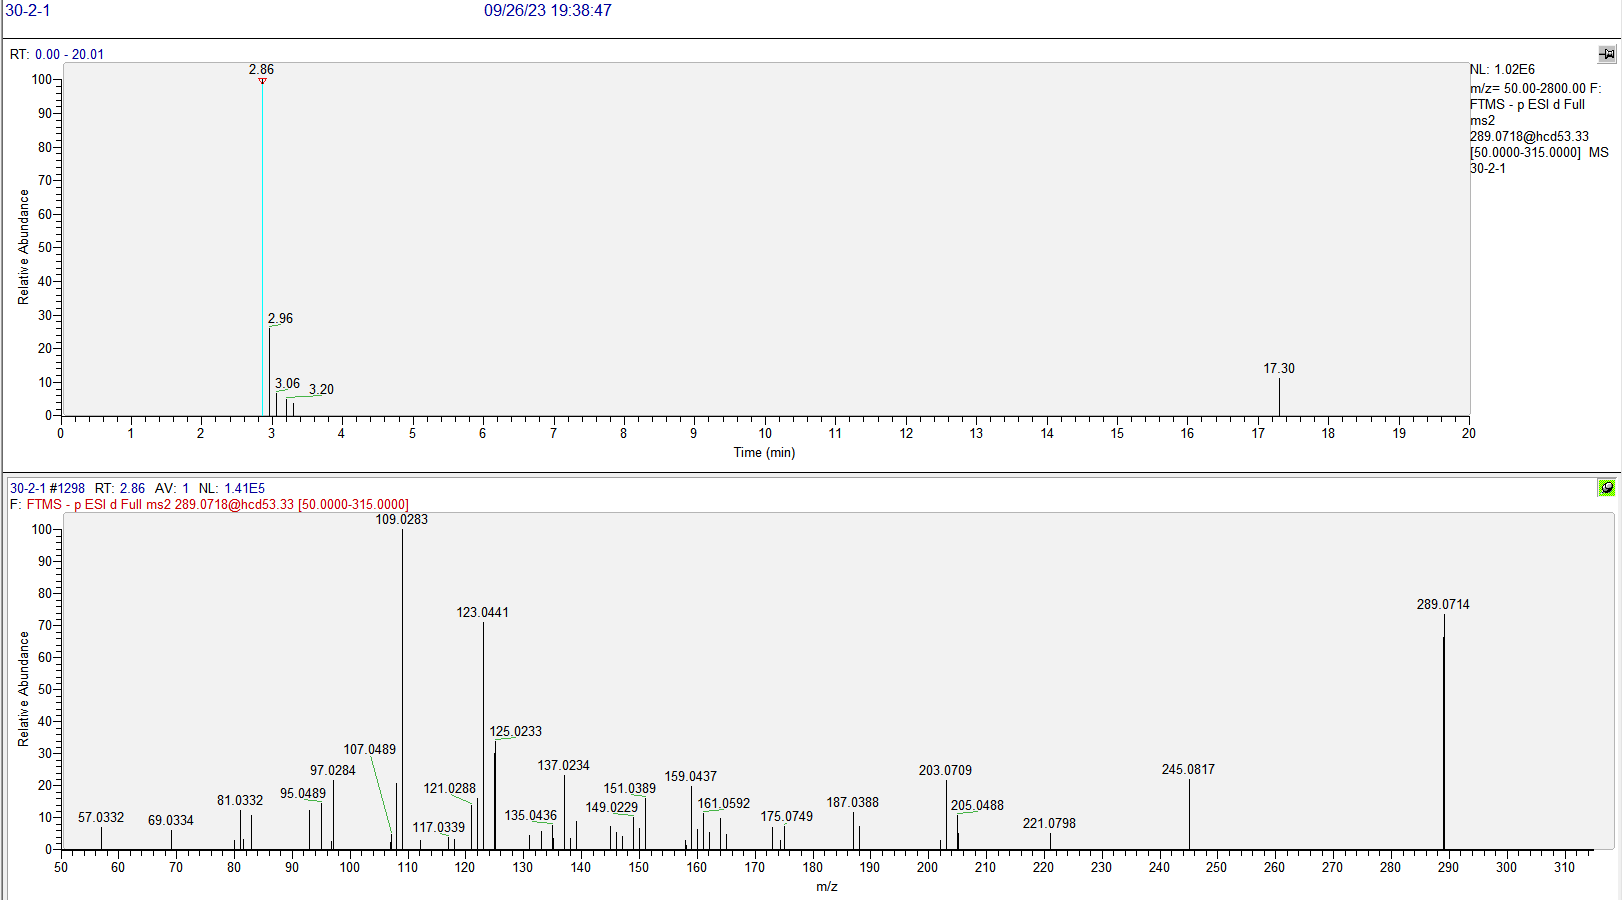


**B**


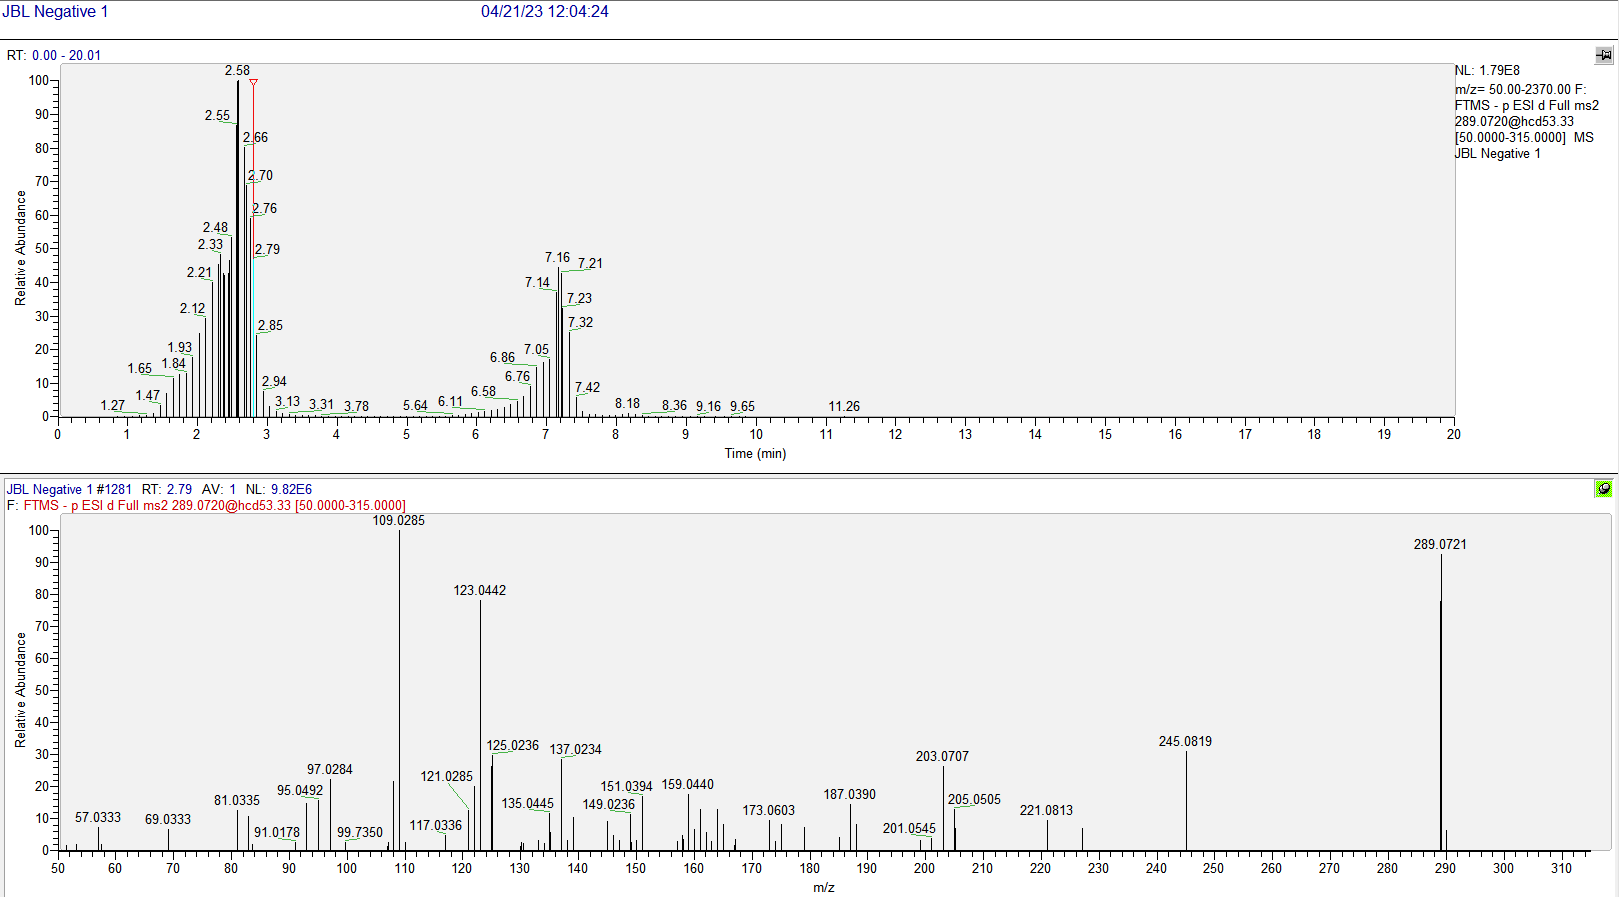


**C**

**A**

**A**

**A**

Fig. S1.2.13 The main results of (+)-catechin (CAS 154-23-4, C15H14O6) and its corresponding peak in the TIC diagram using UPLC-Q-Orbitrap-MS analysis. (**A**) The chromatographic peak in the extract. (**B**)The MS/MS fragments of standard (+)-catechin. (**C**) The MS/MS spectra from chromatographic peak in the JBL extract.

**Note**：The m/z values in purple are the calculated ones. The m/z calculation was based on the relative atomic masses of C (12.0000), H (1.007825), O (15.994915), and N (14.003074)[1]

**Identification**: As seen in Fig. S1.2.13, the extract ion peak, MS/MS spectra, and characteristic pears were highly similar. Thus, the chromatographic peaks in the JBL extracts were identified as (+)-catechin (CAS 154-23-4).

**References**:

[1] JÜRGEN H GROSS, *Mass spectrometry*. 2013, Beijing: Science press.
