# Supplementary material for: Comprehensive database enables the UHPLC-Q-orbitrap-MS/MS method to discover 16 “overlooked” compounds and supply three new pharmacopoeia quality-markers for charred Semen Arecae ( Jiaobinglang )
Source: Royal Society of Chemistry journal article supplement (doi:10.1039/d5ay01507c), 2026-01-01
Supplement: d5ay01507c3.zip [file Suppl._2.14_Iden_Procyanidin_B2_CAS_29106-49-8.1.docx]

*Suppl. 2.14* Identification of Procyanidin B2 (CAS 29106-49-8, C30H26O12, M.W. 578.52).


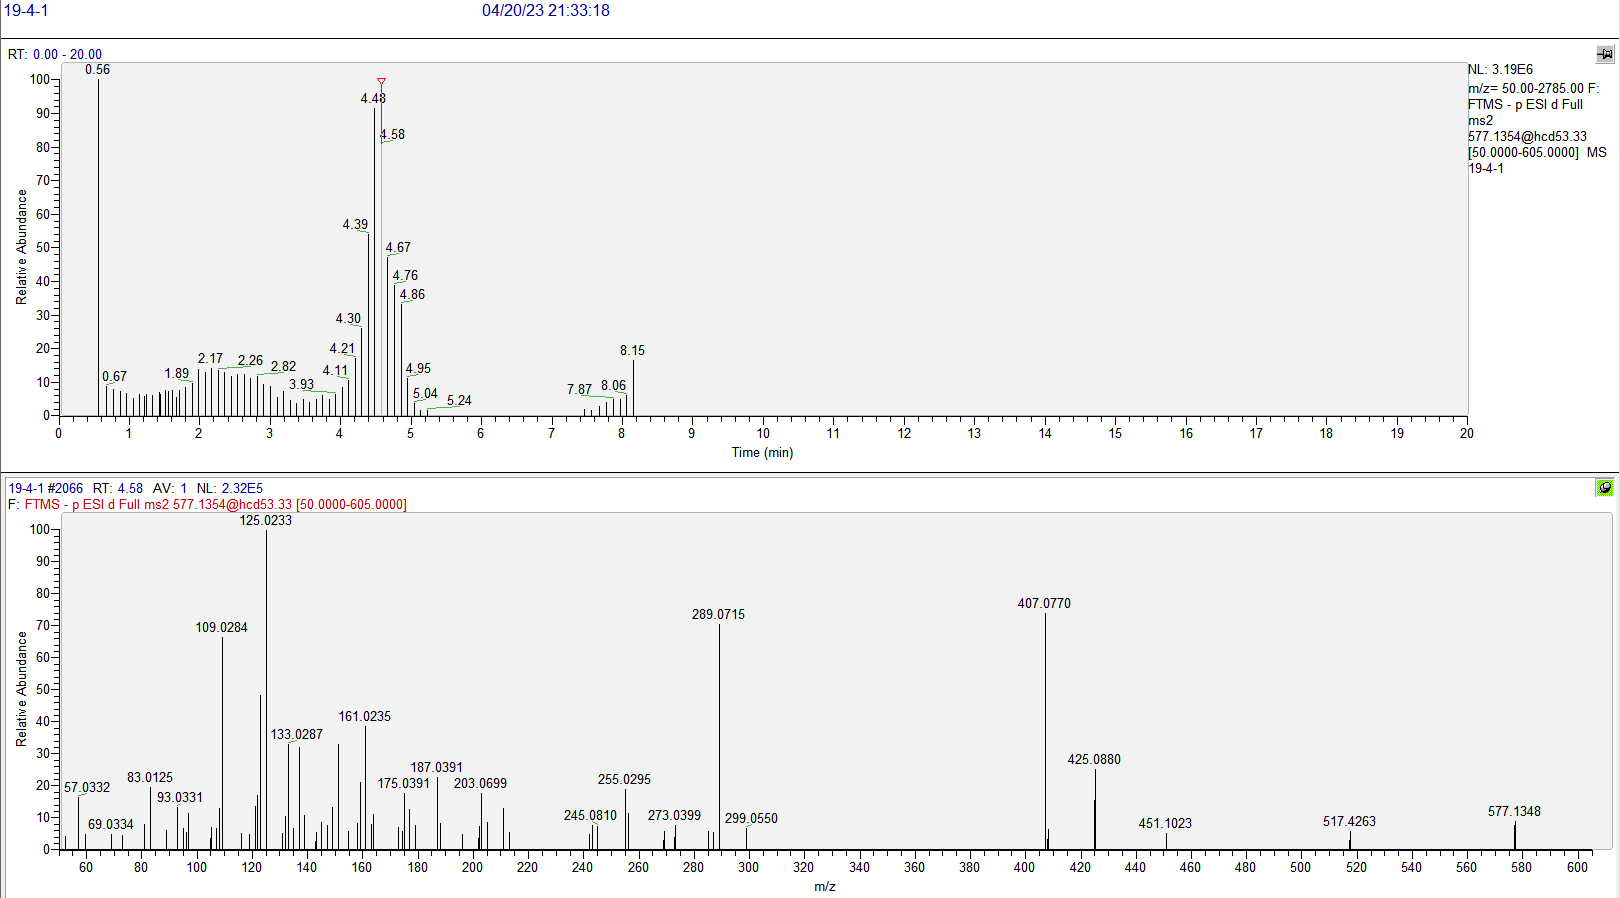


**A**


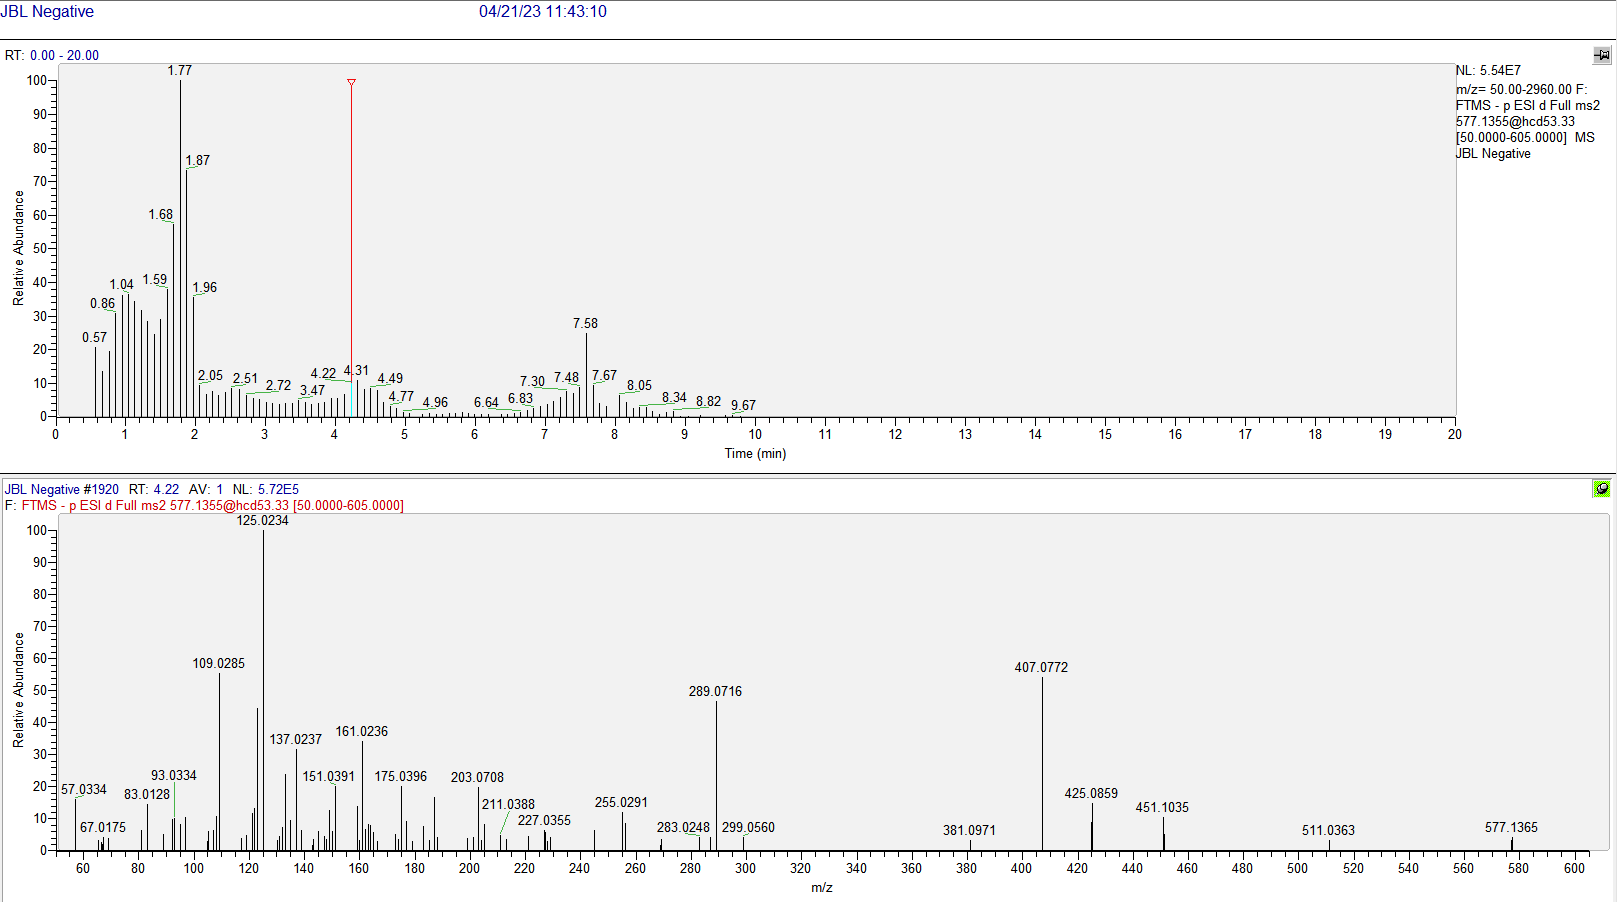


**B**

**A**

**A**

**A**

Fig. S1.2.14 The main results of Procyanidin B2 (CAS 29106-49-8, C30H26O12) and its corresponding peak in the TIC diagram using UPLC-Q-Orbitrap-MS analysis. (**A**) The MS/MS fragments of standard Procyanidin B2. (**B**) The MS/MS spectra from chromatographic peak in the JBL extract.

**Note**：The m/z values in purple are the calculated ones. The m/z calculation was based on the relative atomic masses of C (12.0000), H (1.007825), O (15.994915), and N (14.003074)[1]

**Identification**: As seen in Fig. S1.2.14, the extract ion peak, MS/MS spectra, and characteristic pears were highly similar. Thus, the chromatographic peaks in the JBL extracts were identified as Procyanidin B2 (CAS 29106-49-8).

**References**:

[1] JÜRGEN H GROSS, *Mass spectrometry*. 2013, Beijing: Science press.
