# Supplementary material for: Comprehensive database enables the UHPLC-Q-orbitrap-MS/MS method to discover 16 “overlooked” compounds and supply three new pharmacopoeia quality-markers for charred Semen Arecae ( Jiaobinglang )
Source: Royal Society of Chemistry journal article supplement (doi:10.1039/d5ay01507c), 2026-01-01
Supplement: d5ay01507c3.zip [file Suppl._4_HPLC_analysis_different_batches.1.docx]

*
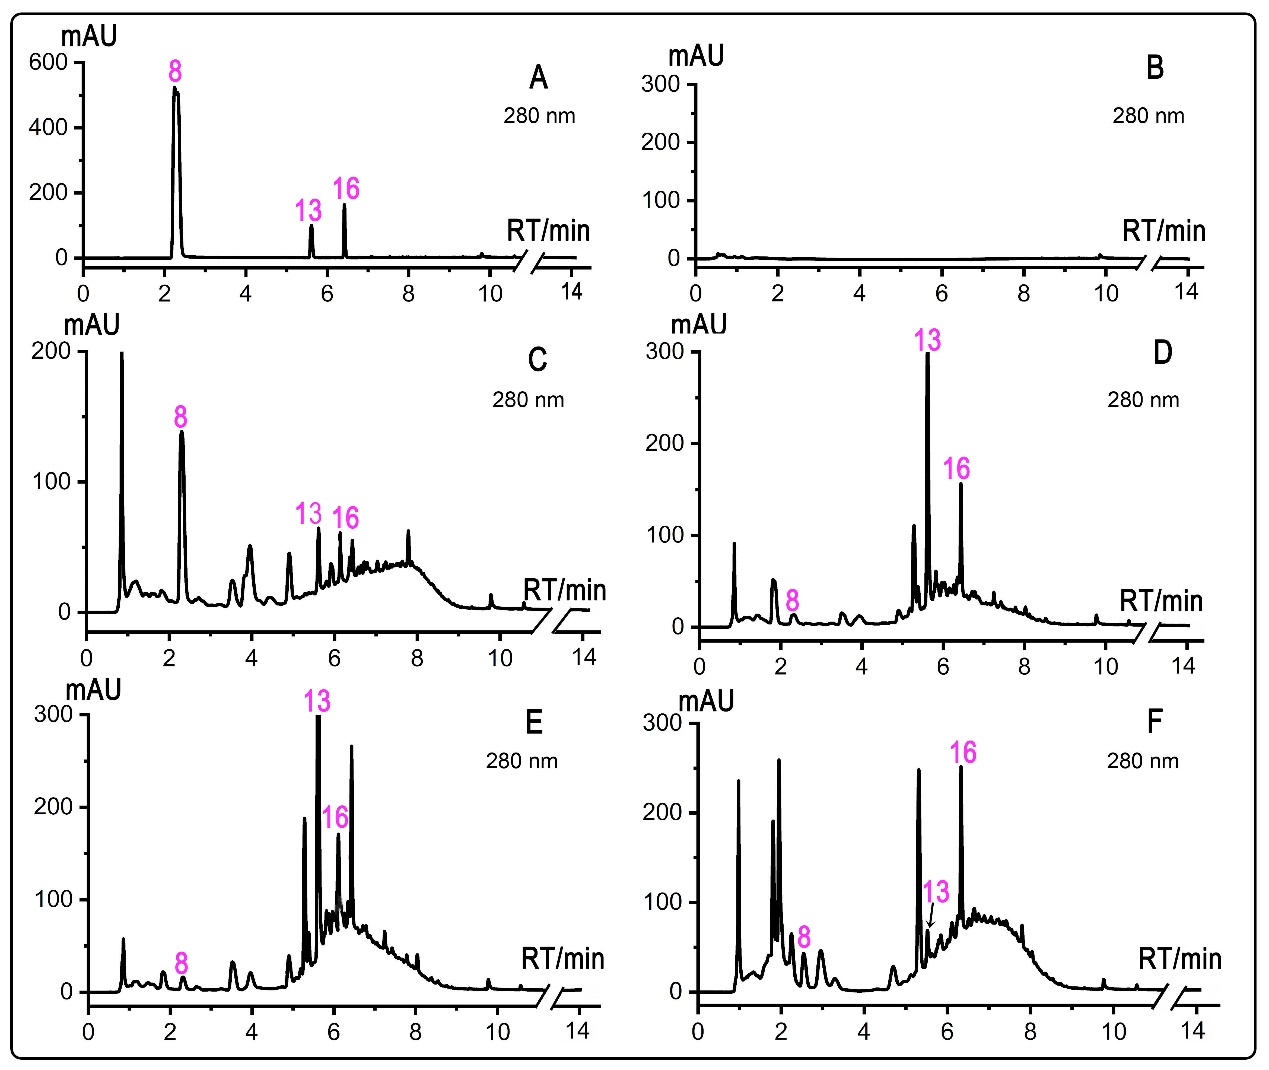
*

**Fig. S4** The main results of validation experiments by UHPLC-UV analysis of three additional markers (**8**, **13**, and **16**). A, the mixed standards of three additional markers (**8**, **13**, and **16**); B, blank (methanol); C, the product from Yunnan Hekou; D, the product from Hainan Sanya; E, the product from Yunnan Xishuangbanna; F, the product from Guangxi Yulin.
